# Supplementary material
Source: PubMed Central journal article supplement (PMC8898036)
Supplement: NIHMS1780435-supplement-1.pdf [file NIHMS1780435-supplement-1.pdf]

Table 3 supplementary file: univariate odds of transition from pre-DM to DM among the 1584 pre-DM men

| Variables*                                                                                                         | Odds Ratio<br>(95%CI) | p-<br>value |
|--------------------------------------------------------------------------------------------------------------------|-----------------------|-------------|
| Non-white [ref = Non-Latino white]                                                                                 | 1.4 (1.1, 1.9)        | 0.01        |
| College degree [ref = No college degree]                                                                           | 1.0 (0.8, 1.4)        | 0.87        |
| Last measure seropositive for Hepatitis C [ref = Last measure seronegative]                                        | 1.5 (0.9, 2.3)        | 0.10        |
| BMI, per five kg/m <sup>2</sup>                                                                                    | 1.5 (1.3, 1.6)        | <.01        |
| Waist circumference, per 10 centimeters                                                                            | 1.4 (1.2, 1.5)        | <.01        |
| Hip circumference, per 10 centimeters                                                                              | 1.3 (1.2, 1.5)        | <.01        |
| Waist-hip ratio, standardized                                                                                      | 1.5 (1.3, 1.7)        | <.01        |
| Weight change between visits, per 10 kilograms                                                                     | 1.1 (0.8, 1.7)        | 0.53        |
| Examiner-assessed lipoatrophy at a visit [ref = No lipoatrophy]                                                    | 2.2 (1.3, 3.5)        | <.01        |
| Examiner-assessed lipohypertrophy at a visit [ref = No lipohypertrophy]                                            | 1.7 (1.2, 2.5)        | <.01        |
| History of hypertension [ref = No history]                                                                         | 2.0 (1.3, 3.0)        | <.01        |
| Dyslipidemia at a visit [ref = No dyslipidemia]                                                                    | 2.7 (1.7, 4.4)        | <.01        |
| eGFR < 60 mL/min/1.73m <sup>2</sup> at any point over follow-up [ref = eGFR never < 60 mL/min/1.73m <sup>2</sup> ] | 1.5 (1.1, 2.0)        | <.01        |
| eGFR, per 10 mL/min/1.73m <sup>2</sup>                                                                             | 1.0 (1.0, 1.1)        | 0.48        |
| Family history of diabetes [ref = No family history]                                                               | 1.9 (1.4, 2.5)        | <.01        |
| Seropositive for HIV [ref = Seronegative]                                                                          | 1.1 (0.9, 1.5)        | 0.32        |
| Former smoker [ref = Never smoked]                                                                                 | 1.0 (0.7, 1.4)        | 0.88        |
| Current smoker [ref = Never smoked]                                                                                | 1.1 (0.7, 1.6)        | 0.64        |
| BMI = body mass index; eGFR = estimated glomerular filtration rate; HIV =human immunodeficiency virus              |                       |             |

\*Controlled for age and number of previous transition from pre-DM to DM.
